# Supplementary material for: Stromal microenvironment processes unveiled by biological component analysis of gene expression in xenograft tumor models
Source: Springer Nature journal article supplement (doi:10.1186/1471-2105-11-s9-s11), 2010-10-01
Supplement: 12859_2010_4273_MOESM2_ESM.pdf [file 12859_2010_4273_MOESM2_ESM.pdf]

**Stromal Microenvironment Processes Unveiled by Biological Component  
Analysis of Gene Expression in Xenograft Tumor Models  
(Supplementary Tables)**

Xinan Yang, PhD<sup>1\*</sup>, Younghee Lee, PhD<sup>1\*</sup>, Yong Huang, MD, MSc<sup>1</sup>, James L Chen, MD<sup>2</sup>, H. Rosie Xing, PhD<sup>3,4§</sup> and Yves A Lussier, MD<sup>1,4,5§</sup>

**Supp. Table 1: Xhyb subset of previous xenograft studies reported cancer deregulated genes.**

| <b>Cancer Type</b>        | <b>Xhyb deregulated Genes</b>                                                                                       | <b>Possible Xhyb deregulated genes</b>                                                                                     |
|---------------------------|---------------------------------------------------------------------------------------------------------------------|----------------------------------------------------------------------------------------------------------------------------|
| Glioblastoma<br>(GBM)[19] | <i>CLIC1, COL11A1, CRYAB,<br/>EMP3, GPR17, HTRA1, ID1,<br/>ITPKB, MAG, PTTG1, RAB33A,<br/>SERPINE2, SGK1, VEGFA</i> | <i>PDGFRA, INSM1, IGFBP3, CCND1,<br/>TMPO, C5orf13, PSME1, CDKN1A,<br/>TJP2, PPP3R1, DDR1, B2M, SCARA3,<br/>EMP1, GFAP</i> |
| Colon<br>cancer[6]        | <i>IGFBP2, IGF2, FN1, TAGLN,<br/>ZBTB16, PRKCA, ID8-72</i>                                                          | <i>HPN, TFF3</i>                                                                                                           |

**Swrr. Table 2: The significant (p<1%) GO terms among the deregulated genes in a published glioblastoma xenograft model.**

| GOTERM                                                                               | Classification |   |   | Conditional hypergeometric p-value |            |                 |
|--------------------------------------------------------------------------------------|----------------|---|---|------------------------------------|------------|-----------------|
|                                                                                      | N              | S | C | Full List                          | Xhyb genes | Remainder genes |
| enzyme linked receptor protein signaling pathway                                     |                |   |   | 0.0084                             | 0.0031     |                 |
| positive regulation of vascular endothelial growth factor receptor signaling pathway |                | 1 |   |                                    | 0.0038     |                 |
| negative regulation of cellular process                                              |                |   |   | 0.0066                             | 0.0043     |                 |
| negative regulation of transforming growth factor beta receptor signaling pathway    |                |   |   | 0.0004                             | 0.0076     |                 |
| cartilage condensation                                                               |                | 1 |   |                                    | 0.0076     |                 |
| BMP signaling pathway                                                                |                | 1 | 1 |                                    | 0.0076     |                 |
| negative regulation of BMP signaling pathway                                         |                | 1 | 1 |                                    | 0.0076     |                 |
| positive regulation of chemotaxis                                                    |                | 1 | 1 |                                    | 0.0076     |                 |
| regulation of positive chemotaxis                                                    |                | 1 | 1 |                                    | 0.0076     |                 |
| induction of positive chemotaxis                                                     |                | 1 | 1 |                                    | 0.0076     |                 |
| visual perception                                                                    | 1              |   |   |                                    | 0.0088     |                 |
| phosphoinositide-mediated signaling                                                  |                |   |   | 0.0015                             |            | 0.0003          |
| nervous system development                                                           |                |   | 1 | 0.0025                             |            | 0.0011          |
| anatomical structure development                                                     |                |   |   |                                    |            | 0.0019          |
| mesenchymal cell development                                                         |                | 1 |   | 0.0063                             |            | 0.0023          |
| signal transduction                                                                  |                | 1 | 1 | 0.0000                             |            | 0.0023          |
| cell-cell signaling                                                                  |                | 1 | 1 |                                    |            | 0.0042          |
| dTMP biosynthetic process                                                            |                |   |   | 0.0052                             |            | 0.0046          |
| deoxyribonucleoside monophosphate biosynthetic process                               |                | 1 | 1 | 0.0052                             |            | 0.0046          |
| pyrimidine deoxyribonucleoside monophosphate metabolic process                       |                | 1 | 1 | 0.0052                             |            | 0.0046          |
| positive regulation of phosphoinositide 3-kinase cascade                             |                |   |   | 0.0052                             |            | 0.0046          |
| positive regulation of cyclin-dependent protein kinase activity                      |                |   |   | 0.0001                             |            | 0.0091          |
| posterior midgut development                                                         | 1              |   |   |                                    |            | 0.0091          |
| cyclin catabolic process                                                             |                |   | 1 |                                    |            | 0.0091          |
| pyrimidine deoxyribonucleotide biosynthetic process                                  |                |   |   |                                    |            | 0.0091          |
| clathrin cage assembly                                                               |                |   |   |                                    |            | 0.0091          |
| transmembrane receptor protein tyrosine kinase signaling pathway                     |                | 1 | 1 | 0.0003                             |            |                 |
| cell growth                                                                          |                | 1 | 1 | 0.0005                             |            |                 |
| multicellular organismal development                                                 |                |   |   | 0.0006                             |            |                 |

|                                                            |   |   |        |
|------------------------------------------------------------|---|---|--------|
| regulation of phosphate metabolic process                  |   |   | 0.0009 |
| transforming growth factor beta receptor signaling pathway | 1 | 1 | 0.0024 |
| regulation of protein amino acid phosphorylation           |   |   | 0.0026 |
| cell differentiation                                       | 1 | 1 | 0.0039 |
| negative regulation of phosphorylation                     |   |   | 0.0039 |
| organ development                                          | 1 |   | 0.0042 |
| response to stress                                         | 1 | 1 | 0.0043 |
| positive regulation of non-apoptotic programmed cell death |   | 1 | 0.0052 |
| regulation of protein kinase activity                      |   |   | 0.0060 |
| phosphorus metabolic process                               |   |   | 0.0064 |
| regulation of transferase activity                         |   |   | 0.0071 |
| regulation of cell growth                                  | 1 | 1 | 0.0072 |
| extracellular structure organization and biogenesis        | 1 | 1 | 0.0081 |
| regulation of biological quality                           | 1 | 1 | 0.0082 |

**Legend:** N: neither cancer nor stromal cell process; S: stromal cell or functional process; C: cancer cell process; blank in classification: unknown; blank in conditional hypergeometric p-value: not significant ( $p > 1\%$ ).

**Supp. Table 3: Xhyb subset of the differential expressed genes in a previous xenograft study and their corresponding probes in the Agilent array (GPL6480).**

Genes in bold are those identified as Xhyb. According to the literature (Sakariassen et al. 2006), the tumors became more vascular and circumscribed with emerging necrotic regions in the subsequence generation. Moreover, MRI scans showed less invasive, strongly contrast-enhancing tumors in the higher generation.

| Symbol         | FC    | Corresponding Agilent Probes |              |      |         | Biological V1Anno |
|----------------|-------|------------------------------|--------------|------|---------|-------------------|
|                |       | ID                           | Annotation   | GENE | SYMBOL  |                   |
| B2M            | -4    | A_23_P37441                  | NM_004048    | 567  | B2M     | Xhyb              |
|                |       | A_24_P740662                 | AK022379     | 567  | B2M     |                   |
| C5orf13        | 2.4   | A_24_P149124                 | NM_004772    | 9315 | C5orf13 | Xhyb              |
|                |       | A_32_P98423                  | NM_004772    | 9315 | C5orf13 |                   |
| CCND1          | 3.2   | A_24_P193011                 | NM_053056    | 595  | CCND1   | Xhyb              |
|                |       | A_23_P202837                 | NM_053056    | 595  | CCND1   |                   |
|                |       | A_24_P124550                 | NM_053056    | 595  | CCND1   |                   |
| CDKN1A         | -2.8  | A_23_P59210                  | NM_000389    | 1026 | CDKN1A  | Xhyb              |
|                |       | A_24_P89457                  | NM_078467    | 1026 | CDKN1A  |                   |
| <b>CLIC1</b>   | -2.9  | A_23_P30884                  | NM_001288    | 1192 | CLIC1   | Xhyb              |
| <b>COL11A1</b> | 2.5   | A_23_P11806                  | NM_080629    | 1301 | COL11A1 | Xhyb              |
| <b>CRYAB</b>   | -6.2  | A_24_P206776                 | NM_001885    | 1410 | CRYAB   | Xhyb              |
| DDR1           | -3.9  | A_24_P123601                 | NM_013993    | 780  | DDR1    | Xhyb              |
|                |       | A_23_P93311                  | NM_013993    | 780  | DDR1    |                   |
|                |       | A_24_P367289                 | NM_013993    | 780  | DDR1    |                   |
| EMP1           | -7.6  | A_23_P76488                  | NM_001423    | 2012 | EMP1    | Xhyb              |
|                |       | A_24_P921446                 | BC017854     | 2012 | EMP1    |                   |
| <b>EMP3</b>    | -2.4  | A_23_P119362                 | NM_001425    | 2014 | EMP3    | Xhyb              |
| GFAP           | -7.8  | A_24_P31165                  | NM_002055    | 2670 | GFAP    | Xhyb              |
|                |       | A_23_P66593                  | NM_002055    | 2670 | GFAP    |                   |
|                |       | A_24_P59786                  | NM_001131019 | 2670 | GFAP    |                   |
| <b>GPR17</b>   | -2.8  | A_23_P16963                  | NM_005291    | 2840 | GPR17   | Xhyb              |
| <b>HTRA1</b>   | -2.5  | A_23_P97990                  | NM_002775    | 5654 | HTRA1   | Xhyb              |
| <b>ID1</b>     | -10.5 | A_23_P252306                 | NM_002165    | 3397 | ID1     | Xhyb              |
| IGFBP3         | 3.4   | A_23_P215634                 | NM_001013398 | 3486 | IGFBP3  | Xhyb              |
|                |       | A_24_P320699                 | NM_001013398 | 3486 | IGFBP3  |                   |
| INSM1          | 3.4   | A_24_P31676                  | NM_002196    | 3642 | INSM1   | Xhyb              |
|                |       | A_23_P109184                 | NM_002196    | 3642 | INSM1   |                   |
| <b>ITPKB</b>   | -3    | A_23_P372255                 | NM_002221    | 3707 | ITPKB   | Xhyb              |
| <b>MAG</b>     | -4.2  | A_24_P279704                 | NM_080600    | 4099 | MAG     | Xhyb              |
| PDGFRA         | 13.1  | A_23_P300033                 | NM_006206    | 5156 | PDGFRA  | Xhyb              |
|                |       | A_23_P332536                 | BC015186     | 5156 | PDGFRA  |                   |
|                |       | A_32_P100379                 | AA599881     | 5156 | PDGFRA  |                   |
| PPP3R1         | -3.3  | A_23_P108592                 | NM_000945    | 5534 | PPP3R1  | Xhyb              |
|                |       | A_24_P388252                 | NM_000945    | 5534 | PPP3R1  |                   |
| PSME1          | -2.3  | A_23_P151610                 | NM_006263    | 5720 | PSME1   | Xhyb              |
|                |       | A_23_P151614                 | NM_006263    | 5720 | PSME1   |                   |

|                 |      |              |              |       |          |      |
|-----------------|------|--------------|--------------|-------|----------|------|
| <b>PTTG1</b>    | 2.1  | A_23_P7636   | NM_004219    | 9232  | PTTG1    | Xhyb |
| <b>RAB33A</b>   | -3.1 | A_23_P147025 | NM_004794    | 9363  | RAB33A   | Xhyb |
| <b>SCARA3</b>   | -4.9 | A_23_P215900 | NM_016240    | 51435 | SCARA3   | Xhyb |
|                 |      | A_24_P232158 | NM_182826    | 51435 | SCARA3   |      |
| <b>SERPINE2</b> | 2.6  | A_23_P50919  | NM_006216    | 5270  | SERPINE2 | Xhyb |
| <b>SGK1</b>     | -2.5 | A_23_P19673  | NM_005627    | 6446  | SGK1     | Xhyb |
| <b>TJP2</b>     | -3.1 | A_23_P9293   | NM_004817    | 9414  | TJP2     | Xhyb |
|                 |      | A_24_P201153 | NM_201629    | 9414  | TJP2     |      |
| <b>TMPO</b>     | 2.5  | A_24_P210244 | NM_001032283 | 7112  | TMPO     | Xhyb |
|                 |      | A_23_P325040 | NM_003276    | 7112  | TMPO     |      |
| <b>VEGFA</b>    | 8.9  | A_23_P70398  | NM_001025370 | 7422  | VEGFA    | Xhyb |
|                 |      | A_23_P81805  | NM_001025366 | 7422  | VEGFA    | Xhyb |
|                 |      | A_24_P12401  | NM_001025366 | 7422  | VEGFA    | Xhyb |
|                 |      | A_24_P179400 | NM_001025370 | 7422  | VEGFA    |      |

**Supp. Table 4: Xhyb subset of the 28 deregulated genes reported by a previous colon tumor xenograft study and their corresponding Agilent array (GPL6480) probes.**

Genes in bold are those identified as Xhyb. According to the author (Gouye *et al* 2008), HT-29-derived 5M21 which displayed a constitutive invasive behavior in type I collagen, while TATI was shown in this study to be a major autocrine and transforming factor produced by HT-29-derived 5M21 cells to control colon cancer cell invasion and metastasis.

| GenBank no.  | Symbol        | Ratio | Corresponding Agilent Probes |              |      |        | Bio. Anno. |
|--------------|---------------|-------|------------------------------|--------------|------|--------|------------|
|              |               |       | ID                           | GB_ACC       | GENE | SYMBOL |            |
| NM_177978    | CHRD          | -5.2  | A_23_P502047                 | NM_003741    | 8646 | CHRD   | Xhyb       |
|              |               |       | A_24_P117725                 | NM_003741    | 8646 | CHRD   |            |
| NM_00212482  | <b>FN1</b>    | -2.8  | A_24_P119745                 | NM_212482    | 2335 | FN1    | Xhyb       |
|              |               |       | A_24_P85539                  | NM_212482    | 2335 | FN1    | Xhyb       |
| NM_00182983  | HPN           | -2.1  | A_23_P101806                 | NM_182983    | 3249 | HPN    | Xhyb       |
|              |               |       | A_23_P406782                 | NM_182983    | 3249 | HPN    |            |
| NM_002166    | <b>ID2</b>    | 2.4   | A_23_P143143                 | NM_002166    | 3398 | ID2    | Xhyb       |
|              |               |       | A_32_P69368                  | NM_002166    | 3398 | ID2    | Xhyb       |
| NM_000612    | <b>IGF2</b>   | -4.6  | A_23_P150609                 | NM_000612    | 3481 | IGF2   | Xhyb       |
|              |               |       | A_23_P421379                 | NM_000612    | 3481 | IGF2   |            |
| NM_000597    | <b>IGFBP2</b> | -9.6  | A_23_P119943                 | NM_000597    | 3485 | IGFBP2 | Xhyb       |
| NM_002737    | <b>PRKCA</b>  | 2.2   | A_23_P55099                  | NM_002737    | 5578 | PRKCA  | Xhyb       |
|              |               |       | A_24_P916496                 | NM_002737    | 5578 | PRKCA  | Xhyb       |
| NM_001001522 | <b>TAGLN</b>  | -2.2  | A_23_P87011                  | NM_001001522 | 6876 | TAGLN  | Xhyb       |
|              |               |       | A_23_P87013                  | NM_001001522 | 6876 | TAGLN  | Xhyb       |
| NM_003226    | TFF3          | 2     | A_23_P257296                 | NM_003226    | 7033 | TFF3   | Xhyb       |
|              |               |       | A_23_P393099                 | NM_003226    | 7033 | TFF3   |            |
|              |               |       | A_24_P289208                 | NM_003226    | 7033 | TFF3   |            |
| NM_006006    | <b>ZBTB16</b> | 2     | A_23_P104804                 | NM_006006    | 7704 | ZBTB16 | Xhyb       |

**Supp. Table 5: The human probes in S. Table 3 that target their mouse homologs.**

| <b>ProbeID</b> | <b>Hs. gene</b> | <b>Hs. symbol</b> | <b>Anno</b> | <b>Mm. Homolog</b> | <b>Mm. gene</b> | <b>Target*</b> | <b>Score *</b> | <b>Homo-Xhyb**</b> |
|----------------|-----------------|-------------------|-------------|--------------------|-----------------|----------------|----------------|--------------------|
| A_23_P30884    | 1192            | CLIC1             | Xhyb        | Clic1              | 114584          | AK150382       | 88.33          | Y                  |
| A_23_P11806    | 1301            | COL11A1           | Xhyb        | Col11a1            | 12814           | AK157734       | 93.62          | Y                  |
| A_24_P206776   | 1410            | CRYAB             | Xhyb        | Cryab              | 12955           | NW_001030907.1 | 91.5           | Y                  |
| A_23_P119362   | 2014            | EMP3              | Xhyb        | Emp3               | 13732           | NW_001030849.1 | 78.8           | Y                  |
| A_23_P16963    | 2840            | GPR17             | Xhyb        | Gpr176             | 381413          |                |                | N                  |
| A_23_P97990    | 5654            | HTRA1             | Xhyb        | Htra1              | 56213           |                |                | N                  |
| A_23_P252306   | 3397            | ID1               | Xhyb        | Id1                | 15901           | NT_039207.7    | 62.8           | Y                  |
| A_23_P372255   | 3707            | ITPKB             | Xhyb        | Itpkb              | 320404          |                |                | N                  |
| A_24_P279704   | 4099            | MAG               | Xhyb        | Mag                | 17136           | NT_039413.7    | 62.6           | Y                  |
| A_23_P7636     | 9232            | PTTG1             | Xhyb        | Pttg1              | 30939           | XR_002209      | 92.73          | Y                  |
| A_23_P147025   | 9363            | RAB33A            | Xhyb        | Rab33a             | 19337           | NM_011228.1    | 86             | Y                  |
| A_23_P50919    | 5270            | SERPINE2          | Xhyb        | Serpine2           | 20720           |                |                | N                  |
| A_23_P19673    | 6446            | SGK1              | Xhyb        | Sgk1               | 20393           | BC070401       | 96.67          | Y                  |
| A_23_P70398    | 7422            | VEGFA             | Xhyb        | Vegfa              | 22339           | NM_001025250   | 96.67          | Y                  |
| A_23_P81805    | 7422            | VEGFA             | Xhyb        | Vegfa              | 22339           | NM_001025250   | 90.48          | Y                  |
| A_24_P12401    | 7422            | VEGFA             | Xhyb        | Vegfa              | 22339           | NM_001025250   | 98.33          | Y                  |
| A_24_P179400   | 7422            | VEGFA             |             | Vegfa              | 22339           | NM_001025250   | 104            | Y                  |

Legend: Anno: Annotation; Xhyb: cross-mouse hybridize; Homo: homologous; HomoXhyb: the human probes target its mouse homologous predicted by BLASTN.

\* The reported target and score using BLASTN Algorithm with Default Parameters (<http://www.ncbi.nlm.nih.gov/genome/seq/BlastGen/BlastGen.cgi?taxid=10090>)

\*\* Y refers to BLASTN reports significant alignment, otherwise N.

**Supp. Table 6: The identified stromal associated GO terms (hypergeometric test *p*value <1%) that also reported by two gold standards using laser microdissection technology.**

| <b>GOID</b> | <b>Biological Process</b>                                        | <b>Test Method</b> | <b>Reported Gold Standard</b> |
|-------------|------------------------------------------------------------------|--------------------|-------------------------------|
| GO:0007167  | enzyme linked receptor protein signaling pathway                 | test b             | GS1- Breast Cancer Res. 2006  |
| GO:0007601  | visual perception                                                | test b,<br>test d  | GS1- Breast Cancer Res. 2006  |
| GO:0015698  | inorganic anion transport                                        | test d             | GS1- Breast Cancer Res. 2006  |
| GO:0050795  | regulation of behavior                                           | test d             | GS1- Breast Cancer Res. 2006  |
| GO:0007169  | transmembrane receptor protein tyrosine kinase signaling pathway | test d             | GS1- Breast Cancer Res. 2006  |
| GO:0050926  | regulation of positive chemotaxis                                | test d,<br>test b  | GS2 - Nat. Med 2008           |
| GO:0050930  | induction of positive chemotaxis                                 | test d,<br>test b  | GS2 - Nat. Med 2008           |
| GO:0050921  | positive regulation of chemotaxis                                | test d,<br>test b  | GS2 - Nat. Med 2008           |

Test d and test b are conditional hypergeometric tests, using the same background gene list, all the identified genes with cross-hybridize probes on the array. But test b uses the deregulated genes with identified hybridizing probes as inputted gene list, while test d filters the list into homologous genes with Xhyb probes (see **Methods**).
