# Supplementary material for: Stromal microenvironment processes unveiled by biological component analysis of gene expression in xenograft tumor models
Source: Springer Nature journal article supplement (doi:10.1186/1471-2105-11-s9-s11), 2010-10-01
Supplement: 12859_2010_4273_MOESM3_ESM.pdf [file 12859_2010_4273_MOESM3_ESM.pdf]

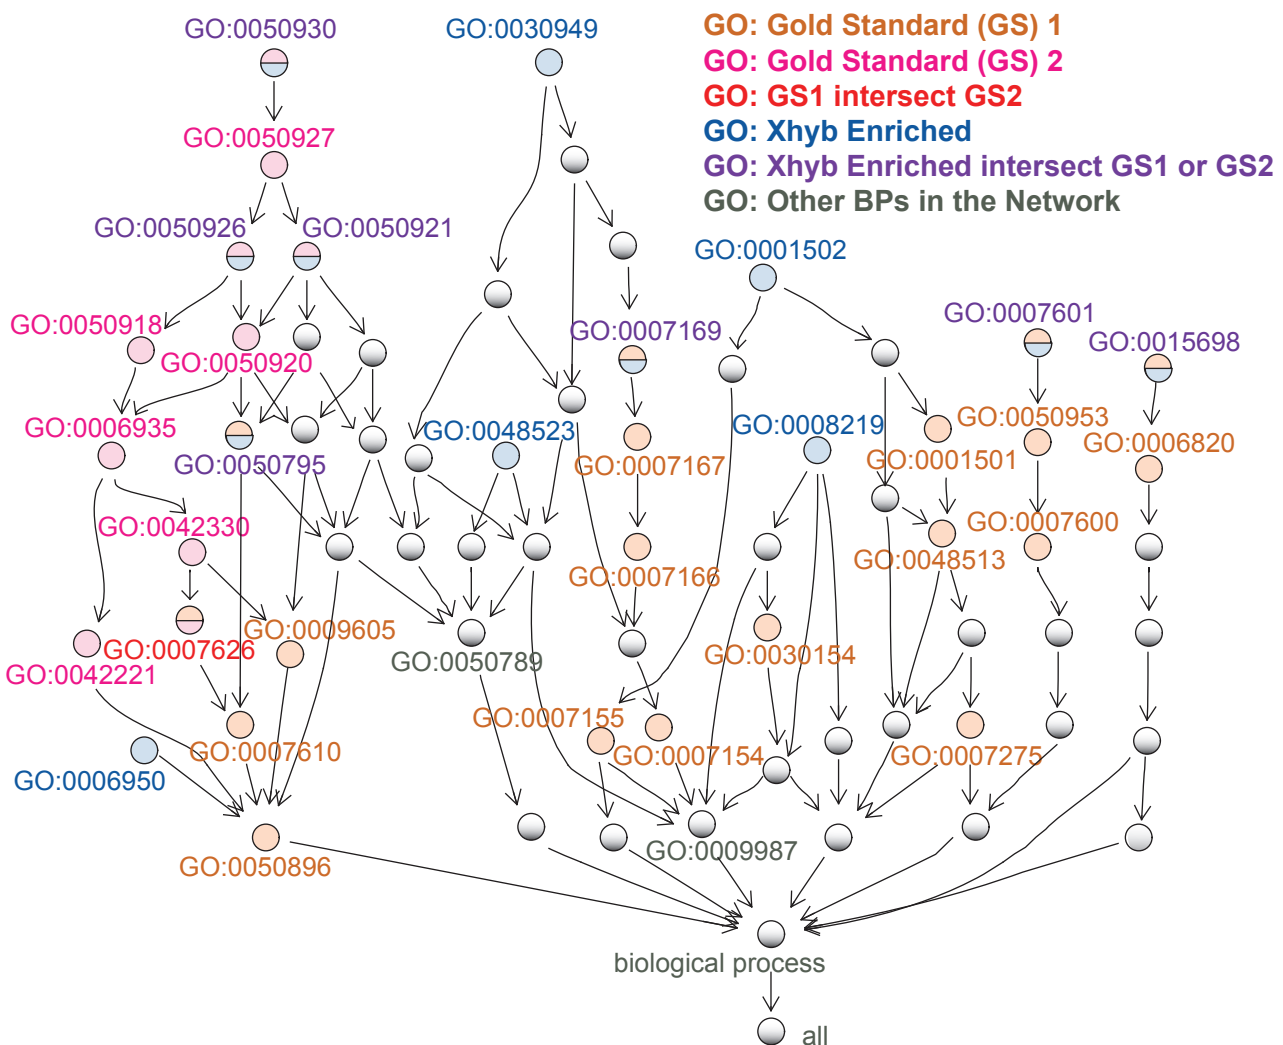

| ID         | Identified Term                                                                               | Nearest GS ID | Nearest GS Term                                                           | Shortest Distance* |
|------------|-----------------------------------------------------------------------------------------------|---------------|---------------------------------------------------------------------------|--------------------|
| GO:0030949 | positive regulation of<br>vascular endothelial<br>growth factor receptor<br>signaling pathway | GO:0007169    | transmembrane<br>receptor protein<br>tyrosine kinase<br>signaling pathway | 3                  |
| GO:0008219 | cell death                                                                                    | GO:0030154    | cell differentiation                                                      | 2                  |
| GO:0001502 | cartilage<br>condensation                                                                     | GO:0007155    | cell adhesion                                                             | 2                  |
| GO:0006950 | response to stress                                                                            | GO:0050896    | response to stimulus                                                      | 1                  |
| GO:0048523 | negative regulation<br>of cellular process                                                    |               |                                                                           |                    |

\*: Number of between Nodes +1
