# Supplementary material for: Stromal microenvironment processes unveiled by biological component analysis of gene expression in xenograft tumor models
Source: Springer Nature journal article supplement (doi:10.1186/1471-2105-11-s9-s11), 2010-10-01

### a) Stromal GO

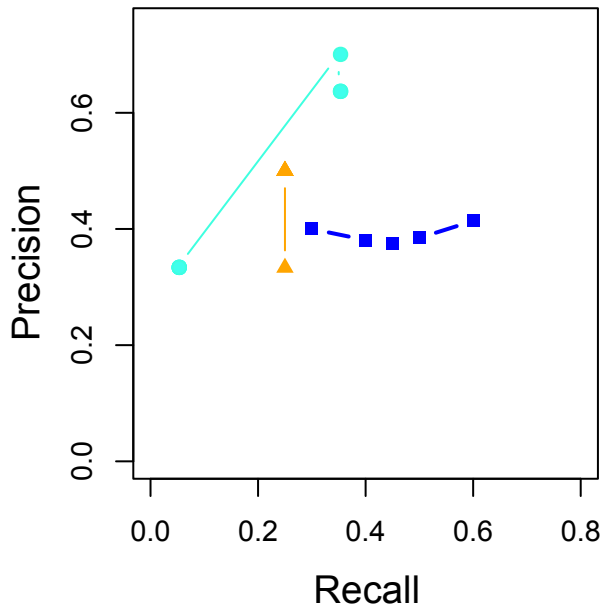

### b) Cancer GO

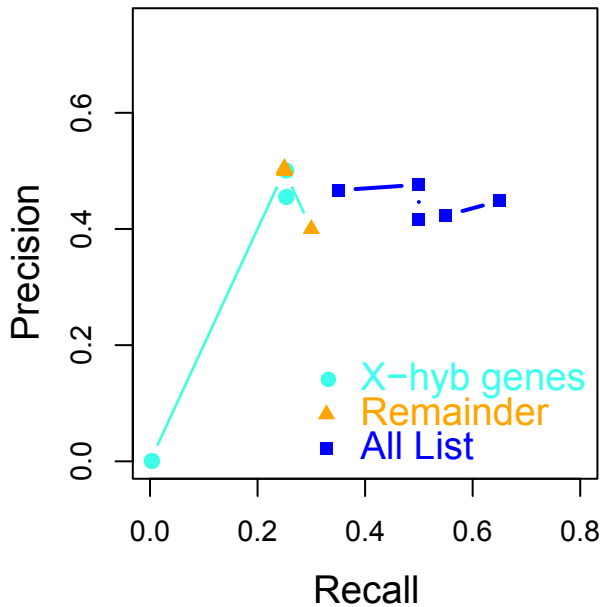

Supplement: 12859_2010_4273_MOESM4_ESM.pdf [file 12859_2010_4273_MOESM4_ESM.pdf]
